# Supplementary material for: Trend study on the association between hospital admissions and the health of Dutch older adults (1995–2009)
Source: PubMed Central journal article supplement — BMJ Open. 2016 Aug 16;6(8):e011967. doi: 10.1136/bmjopen-2016-011967 (PMC5013367; doi:10.1136/bmjopen-2016-011967), 2016-08-16
Supplement: bmjopen-2016-011967supp_table.pdf [file bmjopen-2016-011967supp_table.pdf]

Appendix Table 1. Time trends in admission risk, adjusted for other admission types

|                               | <b>Day admission<br/>OR (95% CI)</b> | <b>Overnight admission<br/>OR (95% CI)</b> | <b>Acute overnight admission<br/>OR (95% CI)</b> |
|-------------------------------|--------------------------------------|--------------------------------------------|--------------------------------------------------|
| Time in years <sup>a</sup>    | 1.097 (1.074-1.120)***               |                                            |                                                  |
| +Overnight admission (yes/no) | 1.098 (1.075-1.121)***               |                                            |                                                  |
| Time in years <sup>a</sup>    |                                      | 1.004 (0.985-1.022)                        |                                                  |
| +Day admission (yes/no)       |                                      | 0.990 (0.972-1.009)                        |                                                  |
| Time in years <sup>a</sup>    |                                      |                                            | 1.031 (1.011-1.052)**                            |
| +Day admission (yes/no)       |                                      |                                            | 1.021 (1.000-1.042)*                             |

\*P<0.05 \*\*P<0.01 \*\*\*P<0.001

<sup>a</sup> Adjusted for all covariates
